# Supplementary material for: Chloride-bridged oxovanadium(v) complexes with alkoxyalkoxide ligands. Synthesis, structure, electrochemistry and reactivities
Source: Royal Society of Chemistry journal article supplement (doi:10.1039/b505750g), 2005-01-01
Supplement: b505750g.pdf [file b505750g.pdf]

---

# Chloride-bridged oxovanadium(V) complexes with alkoxyalkoxide ligands. Synthesis, structure, electrochemistry and reactivities

---

Esther C. E. Rosenthal,\* Huiling Cui, Juliane Koch, Petra Escarpa Gaede, Markus Hummert and Sebastian Dechert

## Electronic Supplementary Information

### Molecular structures of 5, 9 and 10

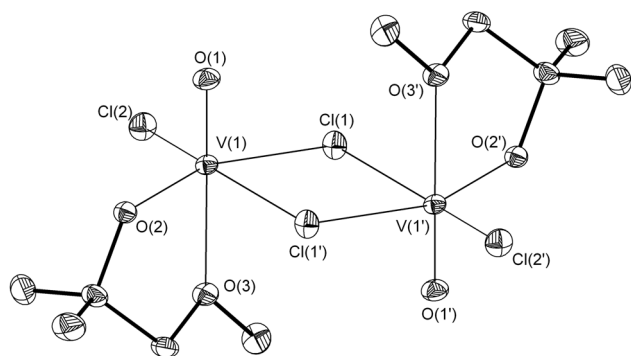

**Fig. 7** Molecular structure of **5**; hydrogen atoms were omitted for clarity. Symmetry transformations used to generate equivalent atoms: 1-x, 1-y, 1-z.

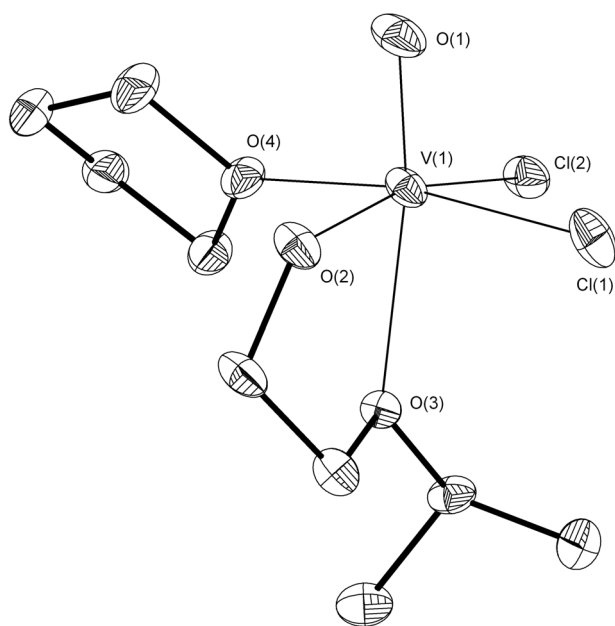

**Fig. 8** Molecular structure of the  $\Lambda$ -form of **9**; hydrogen atoms were omitted for clarity.

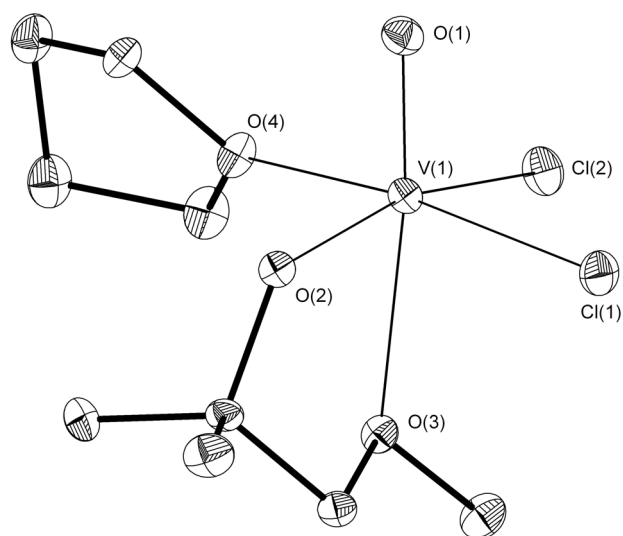

**Fig. 9** Molecular structure of the  $\Lambda$ -form of **10**; hydrogen atoms were omitted for clarity.
